# Supplementary material for: Photocatalytic oxidation of Mn(ii) on the surface of Bi2.15WO6via the ligand-to-metal charge transfer (LMCT) pathway
Source: Royal Society of Chemistry journal article supplement (doi:10.1039/d2cp00623e), 2022-01-01
Supplement: d2cp00623e1.pdf [file d2cp00623e1.pdf]

# **Photocatalytic oxidation of Mn(II) on the surface of Bi<sub>2.15</sub>WO<sub>6</sub> via the ligand-to-metal charge transfer (LMCT) pathway**

**Xing-Fei Guo,<sup>a</sup> Zhao-Yu Liu,<sup>a</sup> Hai-Tao Ren,<sup>\*b</sup> Si-Yuan Yu<sup>a</sup> and Xu Han<sup>\*c</sup>**

<sup>a</sup> State Key Laboratory of Hollow Fiber Membrane Materials and Processes, School of Environmental Science and Engineering, Tiangong University, Tianjin 300387, P.R. China;

<sup>b</sup> Innovation Platform of Intelligent and Energy-Saving Textiles, School of Textile Science and Engineering, Tiangong University, Tianjin 300387, P.R. China;

<sup>c</sup> School of Chemical Engineering and Technology, Tianjin University, Tianjin 300350, P.R. China

**Corresponding Author:**

<sup>\*</sup>E-mail: renhaitao@tiangong.edu.cn (H.T. Ren); xuhan@tju.edu.cn (X. Han)

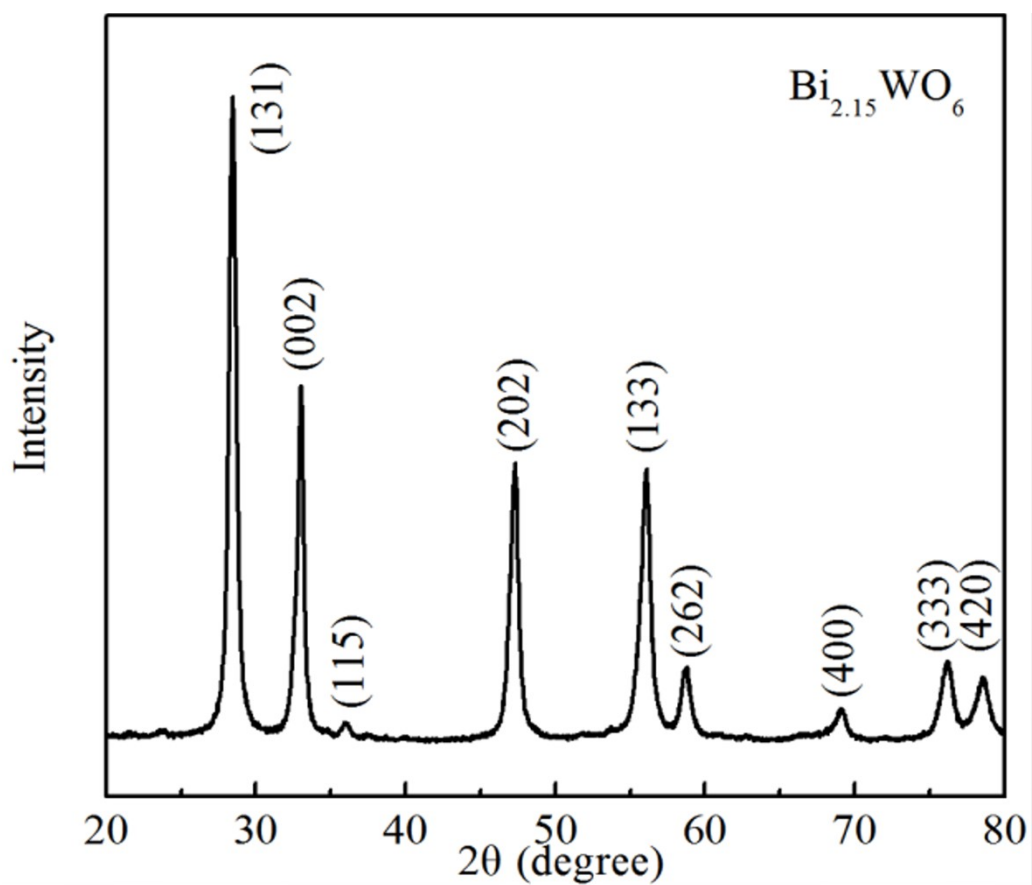

**Fig. S1** XRD pattern of  $\text{Bi}_{2.15}\text{WO}_6$ .

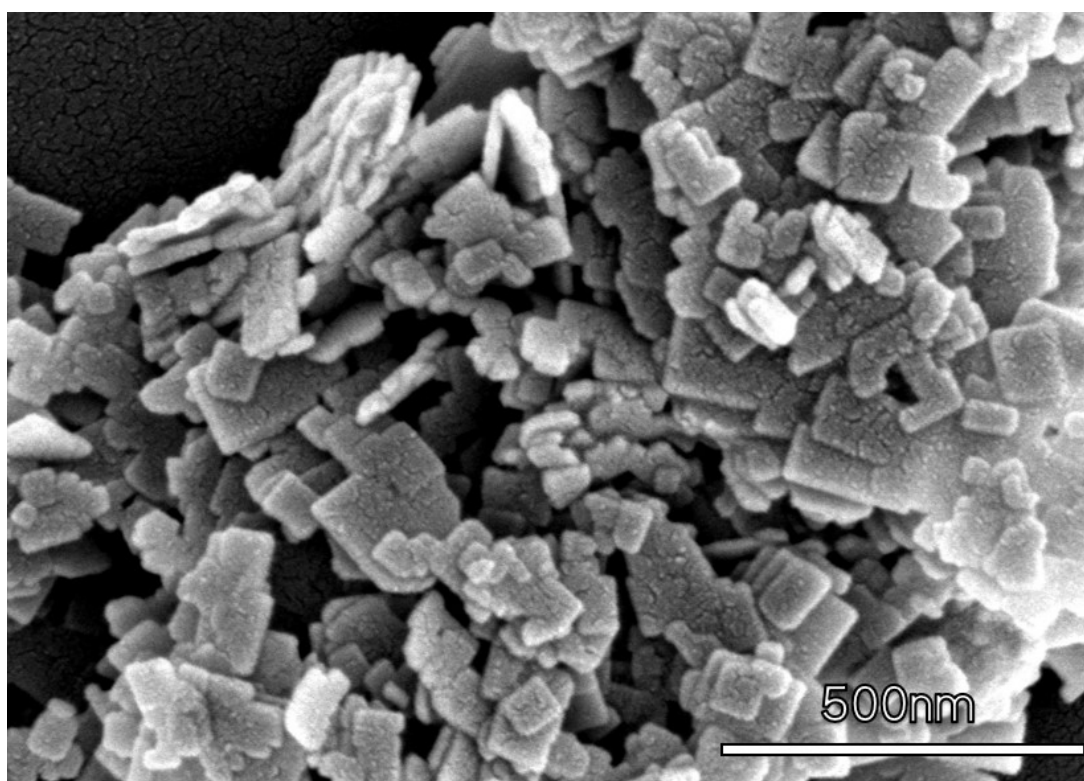

**Fig. S2** SEM image of  $\text{Bi}_{2.15}\text{WO}_6$ .

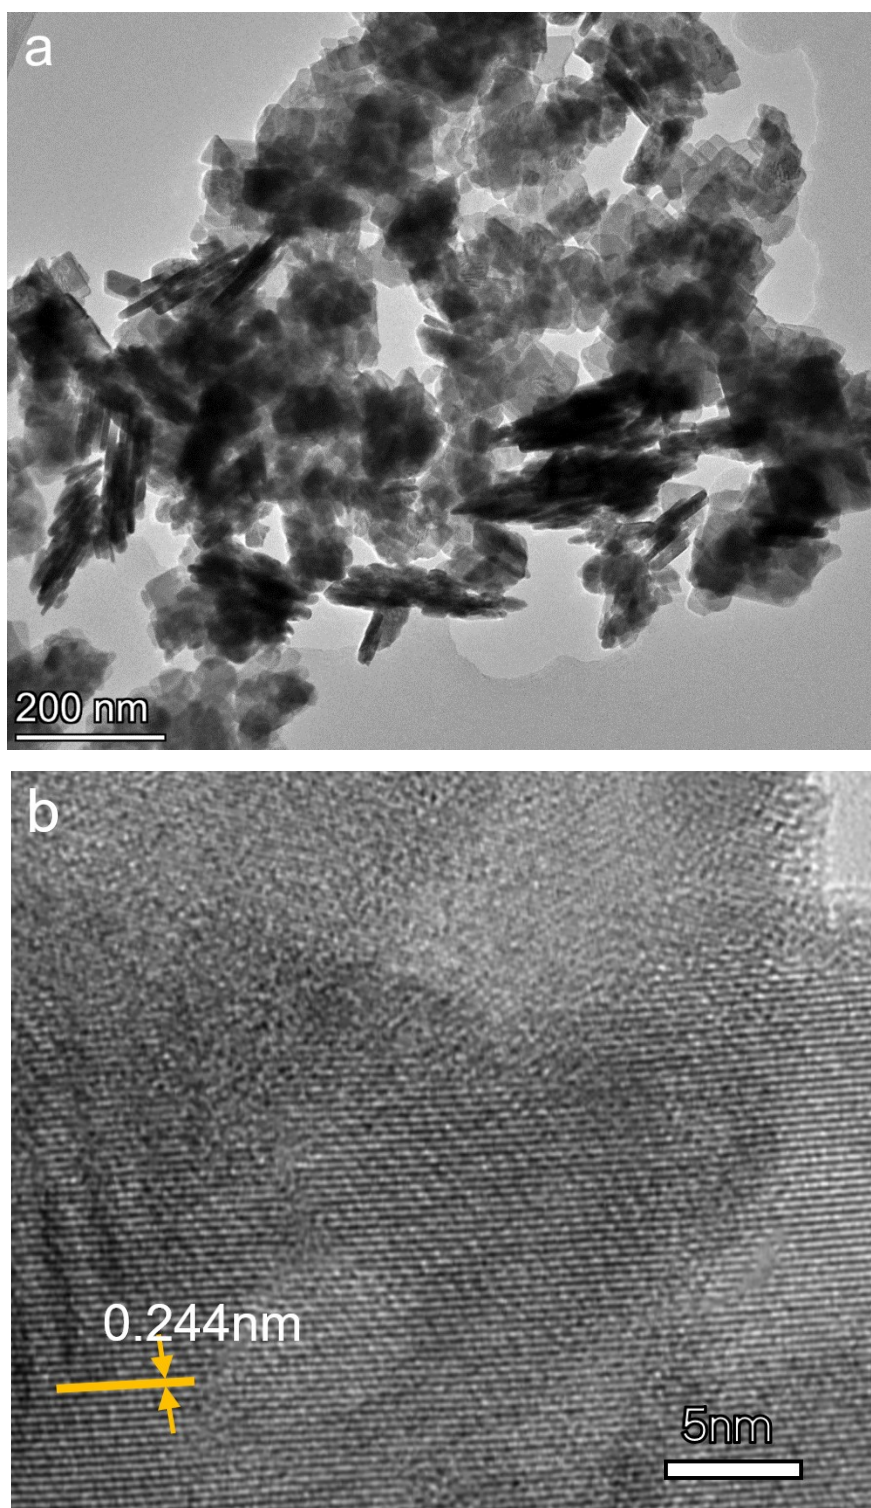

**Fig. S3** TEM image of  $\text{Bi}_{2.15}\text{WO}_6$ .

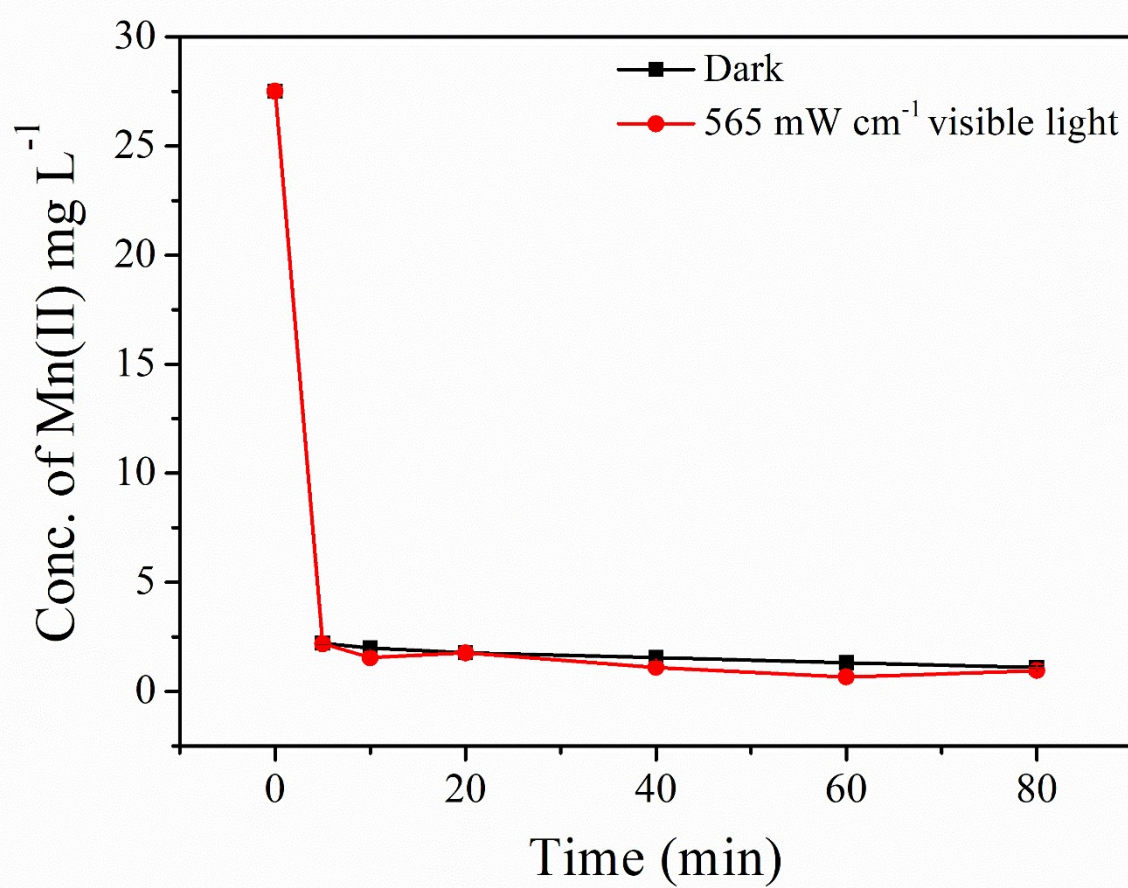

**Fig. S4** Concentration of Mn(II) in dark and 565 mW cm<sup>-1</sup> visible light.  
Conditions: [Bi<sub>2.15</sub>WO<sub>6</sub>] = 1.0 g L<sup>-1</sup>, pH 8.50 and [Mn(II)] = 0.5 mM.



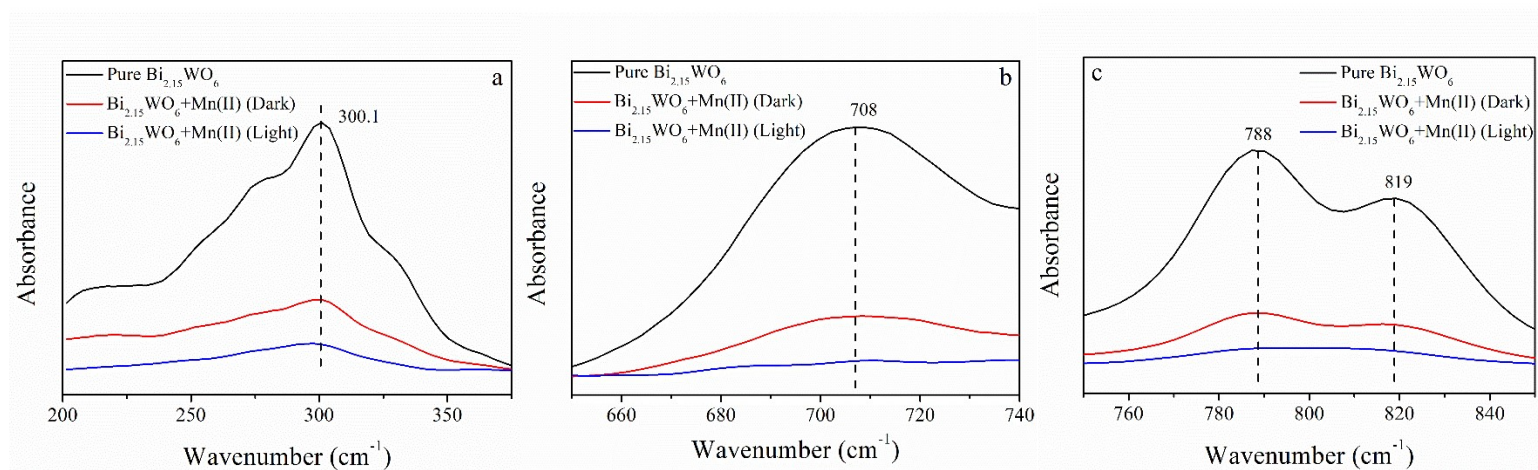

**Fig. S5** Raman spectra of pure  $\text{Bi}_{2.15}\text{WO}_6$  and  $\text{Bi}_{2.15}\text{WO}_6\text{-Mn}$  after reacting with 0.5 mM  $\text{Mn(II)}$  in dark and under visible light.  
(a) 200-375  $\text{cm}^{-1}$ ; (b) 650-740  $\text{cm}^{-1}$ ; (c) 750-850  $\text{cm}^{-1}$ .
